# Supplementary material for: Deep learning detects premalignant lesions in the Fallopian tube
Source: Springer Nature journal article supplement (doi:10.1038/s44294-024-00016-0), 2024-04-29
Supplement: MOESM1 [file 44294_2024_16_MOESM1_ESM.pdf]

**Supplementary material to:**

**“Deep learning detects premalignant lesions in the Fallopian tube”**

**Table of content:**

|                        |          |
|------------------------|----------|
| Supplementary figure 1 | page 2   |
| Supplementary figure 2 | page 3-4 |

Supplementary figure 1

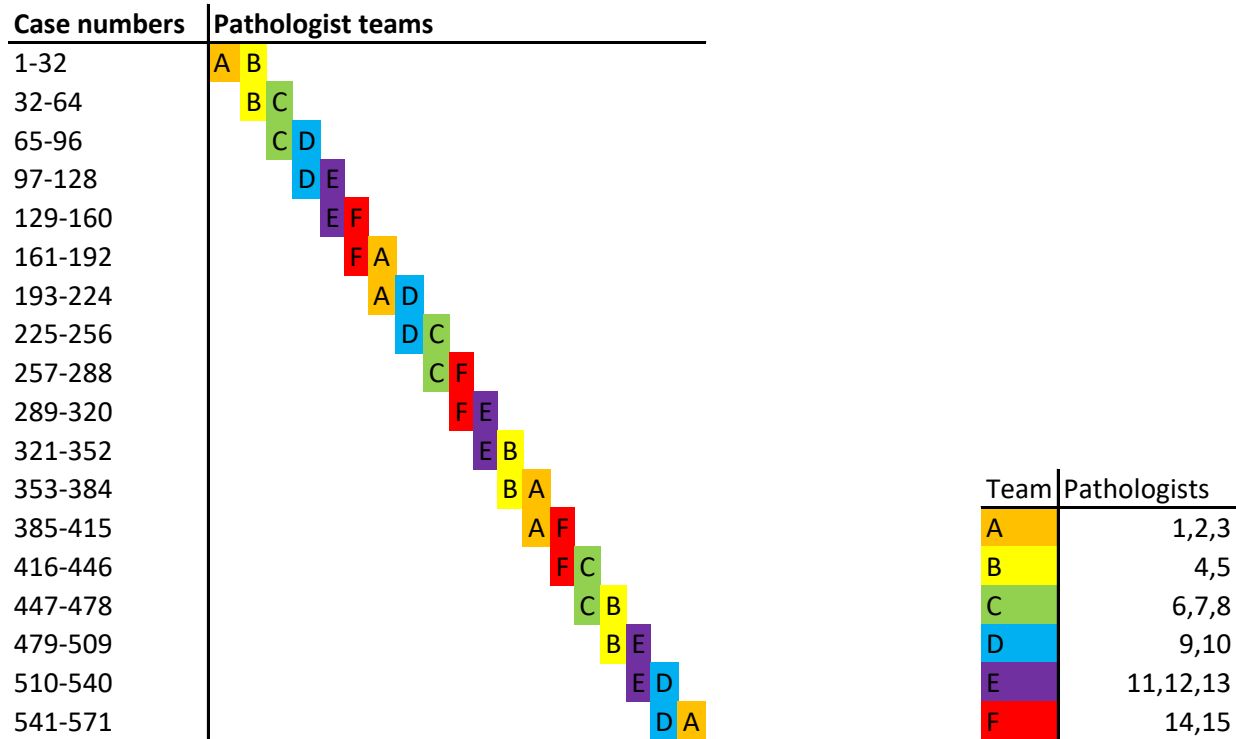

Supplementary figure 1: The left column represents the case numbers

The teams of pathologist are represented by a letter (A-F)

The number of pathologists per group and the color coding of the groups is presented in the legend

Supplementary figure 2

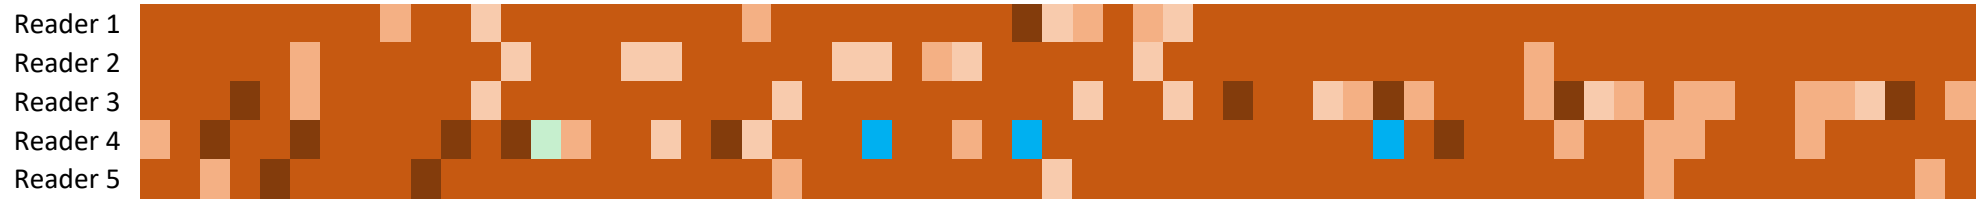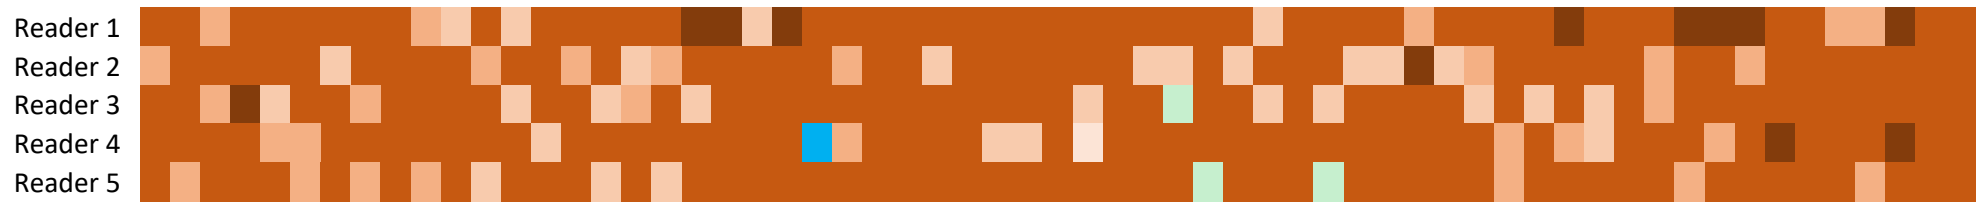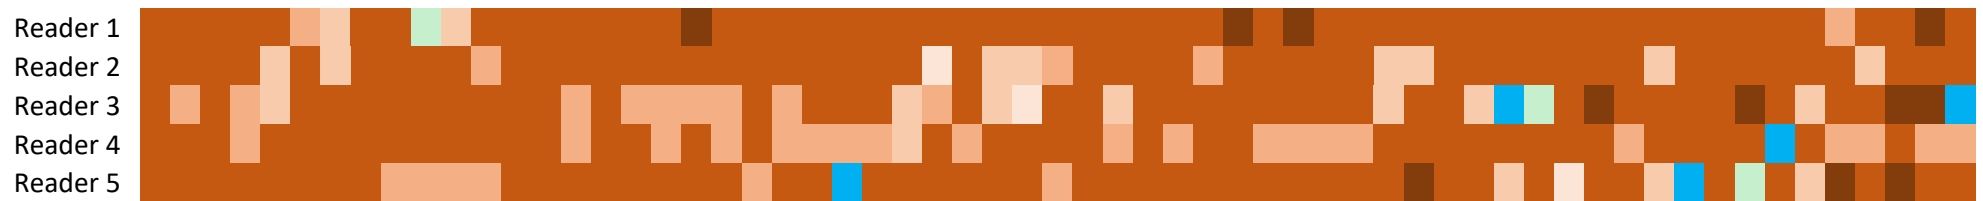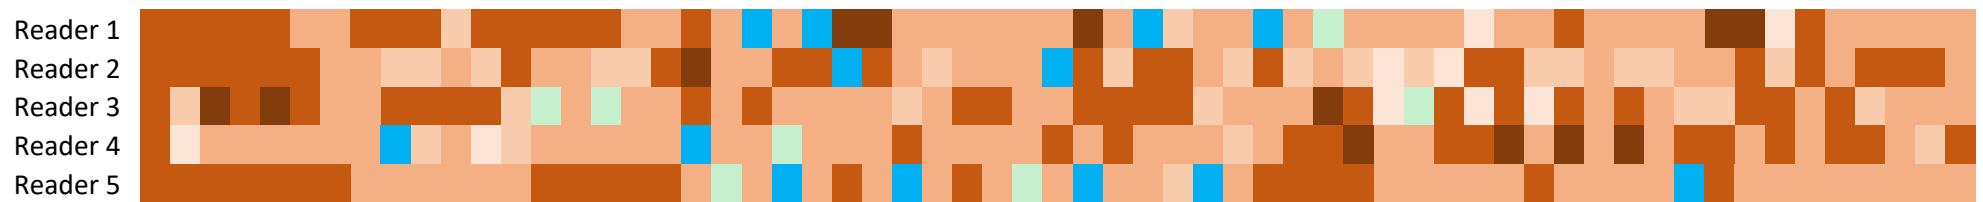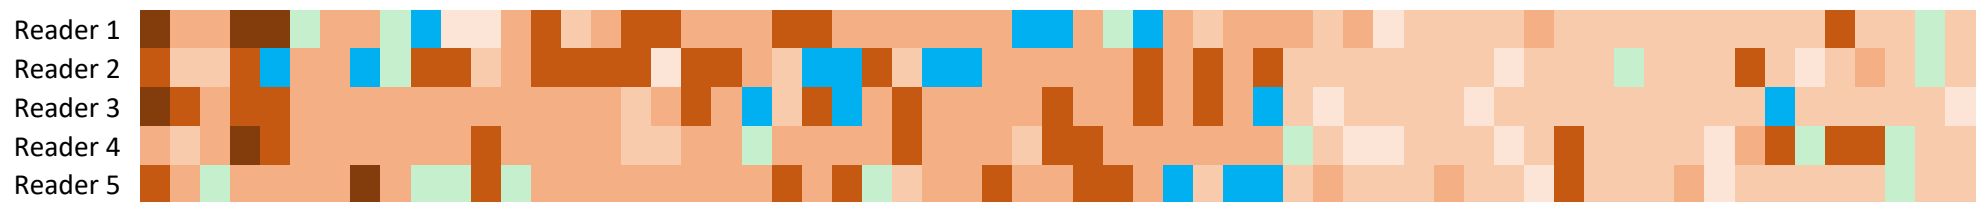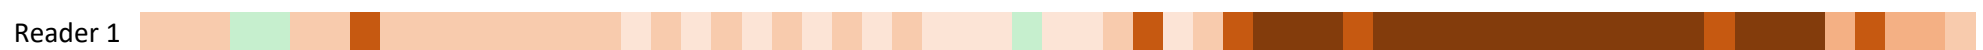

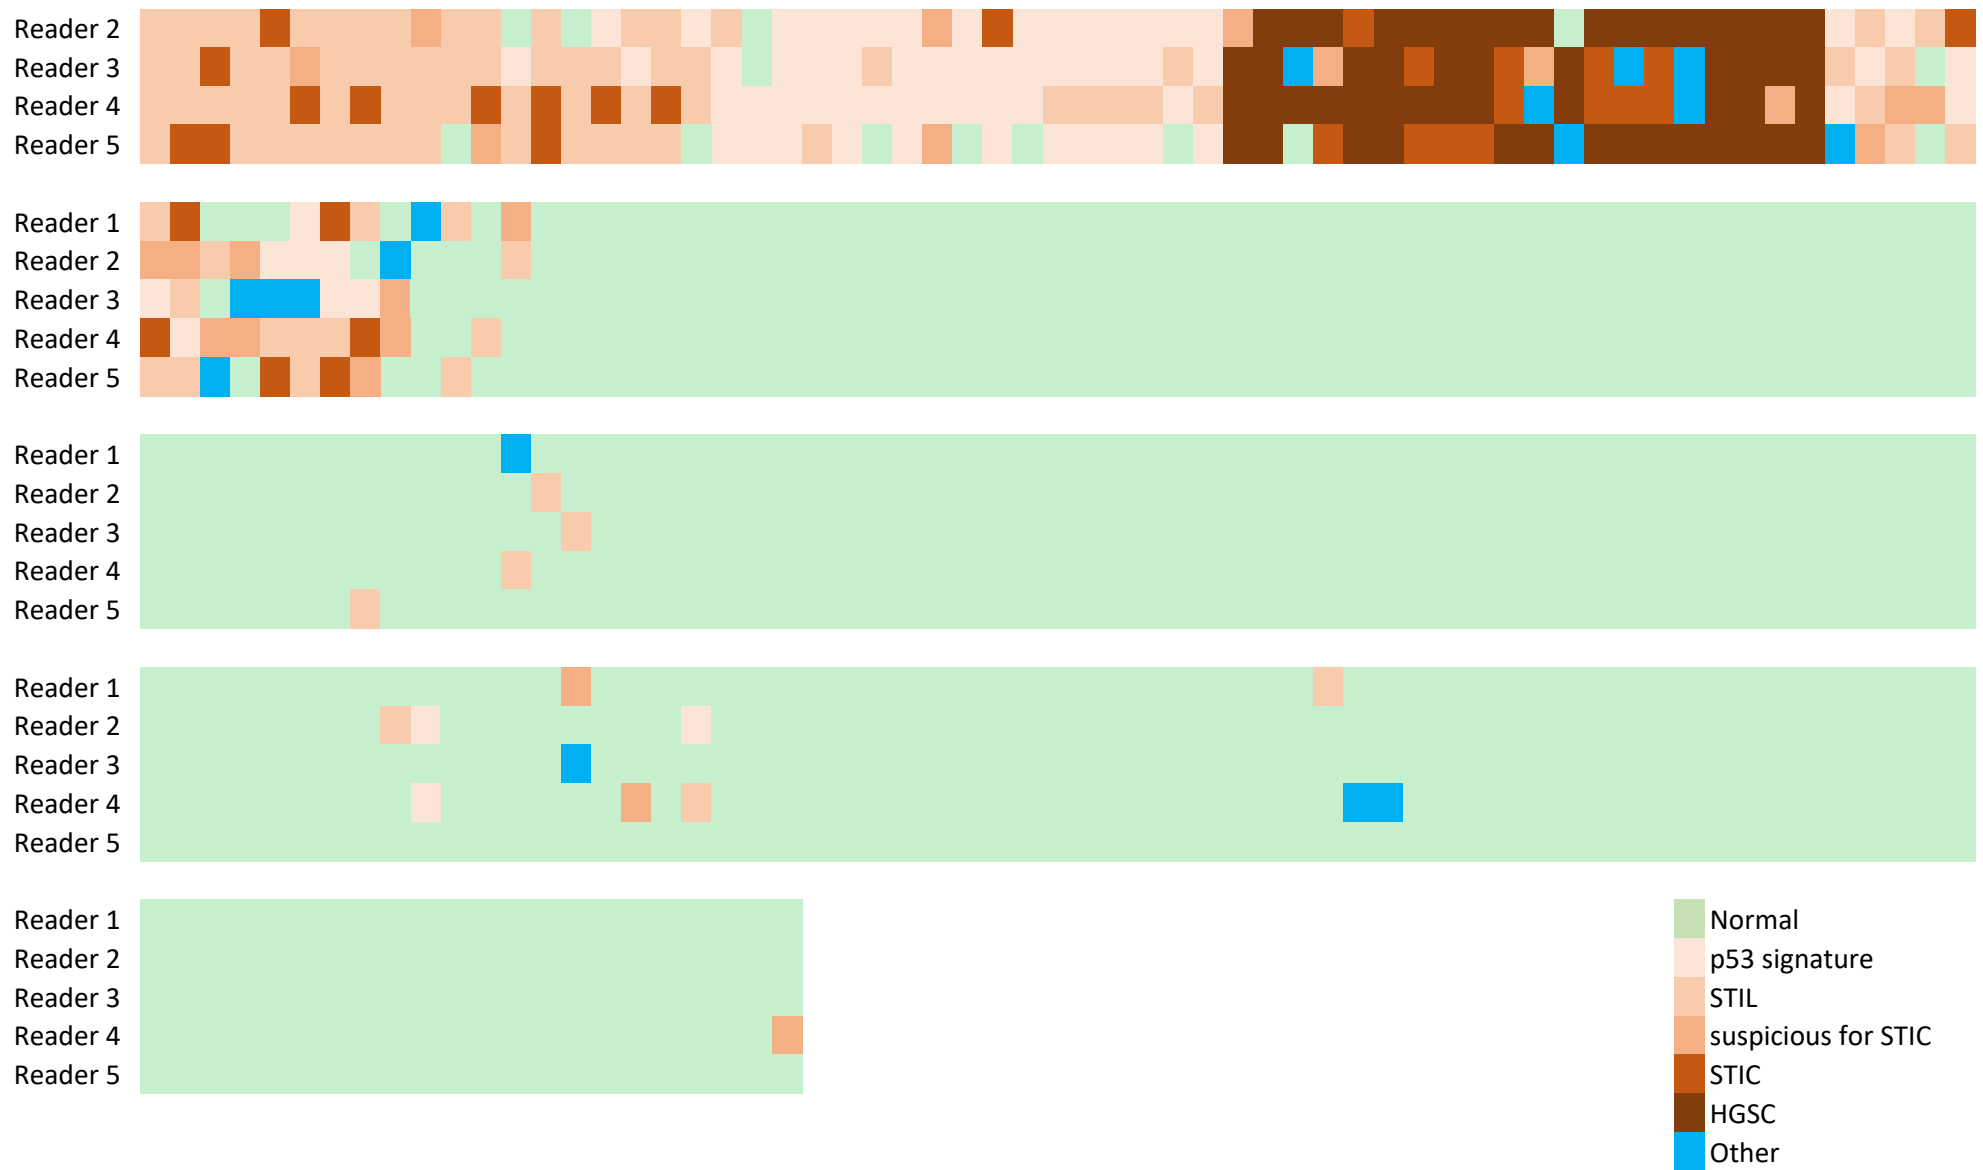

Supplementary figure 2: Overview of the reference standard, resulting from the reader study.  
 Each cell represents a single specimen. Each row represents a reader. Diagnoses are color coded as presented in the legend.
